# Supplementary material for: Modeling-independent elucidation of inactivation pathways in recombinant and native A-type Kv channels
Source: PubMed Central journal article supplement — J Gen Physiol. 2012 Nov;140(5):513–27. doi: 10.1085/jgp.201210869 (PMC3483116; doi:10.1085/jgp.201210869), 2012-11
Supplement: supp_jgp.201210869_JGP_201210869_sm.pdf [file supp_jgp.201210869_JGP_201210869_sm.pdf]

Fineberg et al., <http://www.jgp.org/cgi/content/full/jgp.201210869/DC1>

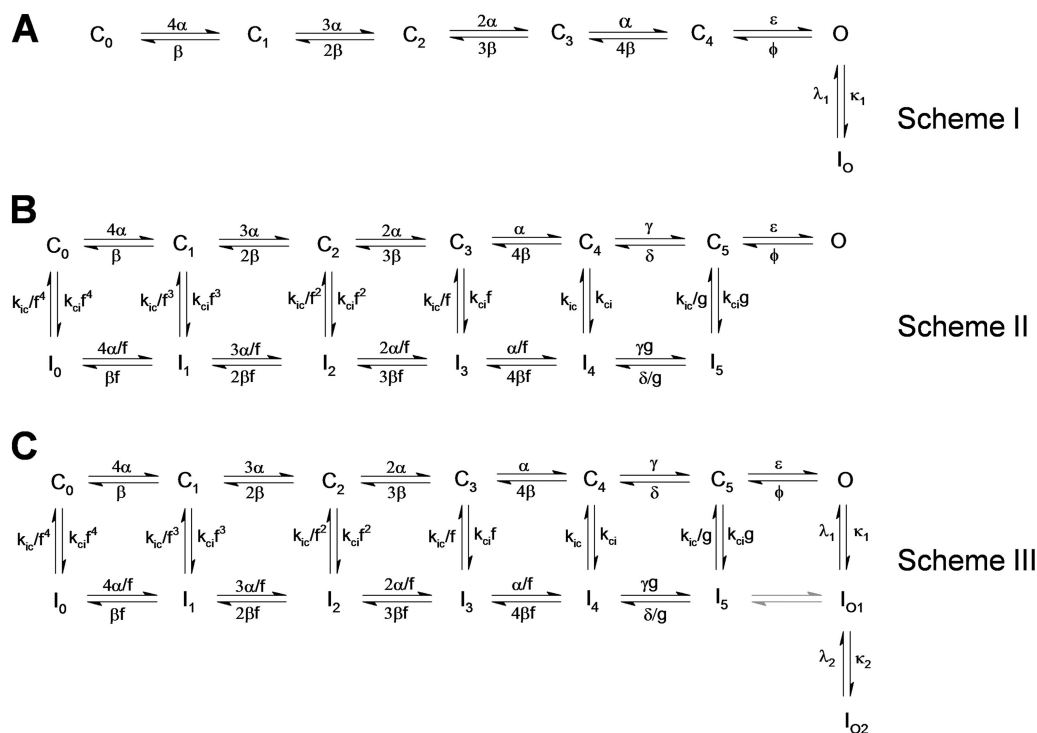

**Figure S1.** Kinetic schemes depicting plausible pathways of inactivation in voltage-gated ion channels. (A) Strict OSI. (B) Strict CSI. (C) Hybrid, CSI + OSI. Gray arrows indicate a subset of this scheme in which interconversion between closed-inactivated and open-inactivated is allowed.

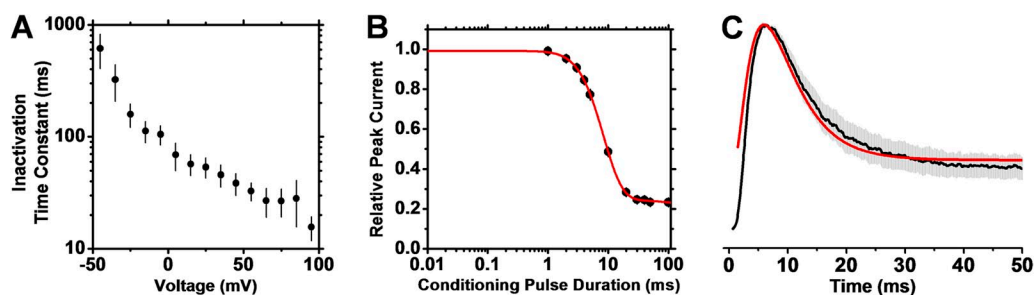

**Figure S2.** The recombinant ShakerB channel expressed in tsA-201 cells undergoes OSI. A–C are analogous to C, E, and F in Figs. 3–10, and details are as described in the Fig. 5 legend. The conditioning pulse activated 32% of the maximum peak conductance. The solid red line in E represents the following empirical best-fit sum of exponential terms:  $I/I_0(t) = 0.86 - 0.75(1 - e^{-t/5})^{2.7} + 0.13e^{-t/858}$ .

*Table S1*  
*Simulation parameters of the kinetic schemes*

| Parameter                        | OSI      | CSI       | <sup>a</sup> CSI | CSI + OSI  |
|----------------------------------|----------|-----------|------------------|------------|
|                                  | Scheme I | Scheme II | Scheme II        | Scheme III |
| $\alpha$ (s <sup>-1</sup> )      | 3,352    | 7,000     | 2,577            | 7,000      |
| $z\alpha$ (e <sub>0</sub> )      | 0.06     | 0.32      | 0.64             | 0.32       |
| $\beta$ (s <sup>-1</sup> )       | 3,230    | 90        | 2.8              | 90         |
| $z\beta$ (e <sub>0</sub> )       | -0.80    | -2.06     | -1.31            | -2.06      |
| $\gamma$ (s <sup>-1</sup> )      | —        | 1,012     | 4,318            | 1,012      |
| $z\gamma$ (e <sub>0</sub> )      | —        | 0.50      | 0.15             | 0.50       |
| $\delta$ (s <sup>-1</sup> )      | —        | 2,499     | 380              | 2,499      |
| $z\delta$ (e <sub>0</sub> )      | —        | -1.15     | -1.21            | -1.15      |
| $\varepsilon$ (s <sup>-1</sup> ) | 434      | 7,690     | 466              | 7,690      |
| $z\varepsilon$ (e <sub>0</sub> ) | 0.52     | 0.06      | 0.07             | 0.06       |
| $\phi$ (s <sup>-1</sup> )        | 70       | 4,386     | 277              | 4,386      |
| $z\phi$ (e <sub>0</sub> )        | -0.37    | -0.07     | -0.25            | -0.07      |
| $k_{ci}$ (s <sup>-1</sup> )      | —        | 122       | 54               | 122        |
| $k_{ic}$ (s <sup>-1</sup> )      | —        | 1.79      | 0.44             | 1.79       |
| $\kappa 1$ (s <sup>-1</sup> )    | 55       | —         | —                | 515        |
| $\lambda 1$ (s <sup>-1</sup> )   | 0.80     | —         | —                | 44         |
| $\kappa 2$ (s <sup>-1</sup> )    | —        | —         | —                | 150        |
| $\lambda 2$ (s <sup>-1</sup> )   | —        | —         | —                | 33         |
| $f$                              | —        | 0.28      | 0.45             | 0.28       |
| $g$                              | —        | 1.01      | 1.03             | 1.01       |

Fig. S1 depicts the diagrams of the kinetic schemes.

<sup>a</sup>Original CSI simulations parameters from Amarillo et al. (2008. *J. Physiol.* 586:2093–2106).
